# Supplementary material
Source: Springer Nature journal article supplement (https://www.springermedizin.de/resource/supplementary/12943_2003_46_MOESM9_ESM.pdf/9553318)

SP600125

Control

SP600125

Control

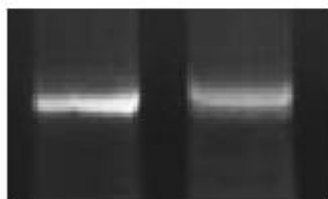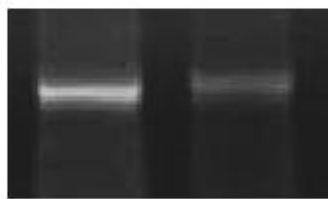

← p8

← RL3

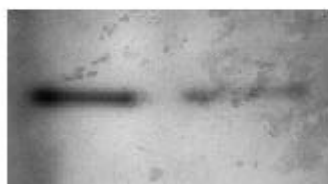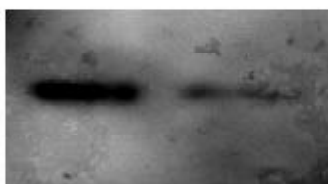

← p8

←  $\beta$ -tubulin

Panc-1

BxPc-3

Supplement: MOESM9 [file 9553318]
